# Supplementary material
Source: publisher figshare collection journal article supplement (https://frontiersin.figshare.com/ndownloader/files/13011716)
Supplement: Supplementary file [file 13011716]

**Supplementary Table 2. Fatty acid content of erythrocytes at 9 wk PI**

|                                |                     | Experimental group      |                       |                               |                                |
|--------------------------------|---------------------|-------------------------|-----------------------|-------------------------------|--------------------------------|
|                                |                     | CON/VEH                 | CON/cSiO <sub>2</sub> | Low DHA/<br>cSiO <sub>2</sub> | High DHA/<br>cSiO <sub>2</sub> |
| Common Name                    | Chemical<br>Formula | (% of total fatty acid) |                       |                               |                                |
| Lauric Acid                    | C14:0               | 0.14 ± 0.04             | 0.15 ± 0.01           | 0.22 ± 0.06                   | 0.25 ± 0.04                    |
| Palmitic Acid                  | C16:0               | 24.02 ± 0.42            | 23.71 ± 0.60          | 26.27 ± 0.48                  | 27.73 ± 0.93                   |
| Palmitelaidic Acid             | C16:1n7t            | 0.05 ± 0.01             | 0.04 ± 0.01           | 0.03 ± 0.01                   | 0.03 ± 0.01                    |
| Palimitoleic Acid              | C16:1n7             | 0.72 ± 0.34             | 0.64 ± 0.11           | 0.77 ± 0.31                   | 0.76 ± 0.11                    |
| Stearic Acid                   | C18:0               | 14.92 ± 0.92            | 15.58 ± 0.73          | 14.38 ± 0.90                  | 13.85 ± 0.35                   |
| Elaidic Acid                   | C18:1t              | 0.13 ± 0.01             | 0.14 ± 0.01           | 0.14 ± 0.03                   | 0.11 ± 0.01                    |
| Oleic Acid                     | C18:1 ω-9           | 19.13 ± 1.51            | 18.40 ± 0.72          | 17.99 ± 0.88                  | 17.81 ± 1.08                   |
| Linoelaidic Acid               | C18:2 ω-6t          | 0.08 ± 0.01             | 0.08 ± 0.01           | 0.06 ± 0.02                   | 0.05 ± 0.01                    |
| Linoleic Acid                  | C18:2 ω-6           | 7.88 ± 0.63             | 8.29 ± 0.59           | 10.42 ± 0.42                  | 10.56 ± 0.46                   |
| Arachidic Acid                 | C20:0               | 0.11 ± 0.01             | 0.12 ± 0.01           | 0.11 ± 0.01                   | 0.11 ± 0.02                    |
| Gamma-Linolenic Acid           | C18:3 ω-6           | 0.06 ± 0.00             | 0.06 ± 0.01           | 0.05 ± 0.00                   | 0.04 ± 0.01                    |
| Eicosenoic Acid                | C20:1n9             | 0.37 ± 0.02             | 0.36 ± 0.02           | 0.32 ± 0.02                   | 0.27 ± 0.03                    |
| Alpha-Linolenic Acid           | C18:3 ω-3           | 0.03 ± 0.02             | 0.02 ± 0.01           | 0.03 ± 0.01                   | 0.02 ± 0.01                    |
| Eicosadienoic Acid             | C20:2 ω-6           | 0.20 ± 0.01             | 0.20 ± 0.01           | 0.24 ± 0.01                   | 0.21 ± 0.01                    |
| Behenic Acid                   | C22:0               | 0.11 ± 0.04             | 0.08 ± 0.03           | 0.08 ± 0.02                   | 0.08 ± 0.03                    |
| Dihomo-gamma-linolenic<br>Acid | C20:3 ω-6           | 1.32 ± 0.11             | 1.26 ± 0.10           | 1.88 ± 0.13                   | 1.50 ± 0.15                    |
| Arachidonic Acid               | C20:4 ω-6           | 21.85 ± 1.17            | 22.16 ± 0.58          | 10.82 ± 0.63                  | 4.90 ± 0.60                    |
| Lignoceric Acid                | C24:0               | 0.19 ± 0.05             | 0.18 ± 0.05           | 0.18 ± 0.04                   | 0.17 ± 0.05                    |
| Eicosapentaenoic Acid          | C20:5 ω-3           | 0.10 ± 0.01             | 0.10 ± 0.01           | 2.01 ± 0.25                   | 4.91 ± 0.49                    |
| Nervonic Acid                  | C24:1 ω-9           | 0.29 ± 0.07             | 0.30 ± 0.07           | 0.27 ± 0.05                   | 0.26 ± 0.06                    |
| Adrenic Acid                   | C22:4 ω-6           | 2.25 ± 0.15             | 2.20± 0.09            | 0.47 ± 0.07                   | 0.12 ± 0.02                    |
| Omega-6                        | C22:5 ω-6           | 0.99 ± 0.12             | 0.92 ± 0.07           | 0.08 ± 0.02                   | 0.03 ± 0.01                    |
| Docosapentaenoic Acid          |                     |                         |                       |                               |                                |
| Omega-3                        | C22:5 ω-3           | 0.33 ± 0. 03            | 0.31 ± 0.03           | 0.77 ± 0.04                   | 0.96 ± 0.06                    |
| Docosapentaenoic Acid          |                     |                         |                       |                               |                                |
| Docosahexaenoic Acid           | C22:6 ω-3           | 4.71 ± 0.29             | 4.69 ± 0.16           | 12.41 ± 0.51                  | 15.26 ± 0.84                   |
|                                | Σ SFA               | 39.52 ± 0.93            | 39.83 ± 0.89          | 41.24 ± 0.67                  | 42.19 ± 0.94                   |
|                                | Σ MUFA              | 20.69 ± 1.81            | 19.88 ± 0.82          | 19.53 ± 1.17                  | 19.24 ± 1.17                   |
|                                | ΣPUFA (ω-3)         | 5.17 ± 0.28             | 5.12 ± 0.16           | 15.22 ± 0.68                  | 21.15 ± 0.74                   |
|                                | Σ PUFA (ω-6)        | 34.63 ± 1.12            | 35.16 ± 0.77          | 24.01 ± 0.54                  | 17.41 ± 0.70                   |
